# Supplementary material
Source: PubMed Central journal article supplement (PMC8297983)
Supplement: mmc1.pdf [file mmc1.pdf]

# Supporting Information

## Introduction

Table 1: Key COVID-19 Restrictions During Alert Level 4 and Alert Level 3 in New Zealand

| Key Restrictions  | Alert Level 4 (Lockdown)<br>25 March 2020 to 26 April 2020                                                                                                                                | Alert Level 3<br>27 April 2020 to 13 May 2020                                                                                                                        |
|-------------------|-------------------------------------------------------------------------------------------------------------------------------------------------------------------------------------------|----------------------------------------------------------------------------------------------------------------------------------------------------------------------|
| Access to food    | All business closed except for essential services. This included closure of all food outlets: fast food shops, takeaway outlets, cafes, restaurants, butchers, and specialty food stores. | Businesses could open premises, but no physical interaction with customers. This included restaurants, cafes, takeaway outlets, butchers, and specialty food stores. |
|                   | Essential services remained open, such as supermarkets, convenience stores, and food delivery businesses that provided meal ingredients which are prepared and consumed at home.          | Same.                                                                                                                                                                |
|                   | All gatherings cancelled and all public venues closed, including food courts and fruit and vegetable markets.                                                                             | Same.                                                                                                                                                                |
| Physical Activity | Only local safe recreational activity was allowed, such as walking, running, bike rides close to home. No water sports, or outdoor activities such as mountain biking or hiking.          | Same.                                                                                                                                                                |
|                   | All public venues closed, including gyms, pools, and playgrounds. All sports events cancelled.                                                                                            | Same.                                                                                                                                                                |
| Health care       | Reprioritisation of healthcare services.                                                                                                                                                  | Healthcare services to use virtual, non-contact consultations where possible.                                                                                        |
| Education         | All educational facilities closed.                                                                                                                                                        | Only early learning centres and schools could open for children whose parents.                                                                                       |
| Other             | All people were to stay at home other than for essential personal movement.                                                                                                               | Could expand the household to include family or nanny/childcare if required.                                                                                         |



**On average, how many servings of bread/toast, chapatti/roti or bread roll did you eat per day?**

**A serving is the same as 1 slice of bread/toast, 1 chapatti/roti or 1 bread roll**

|                         | 0                     | 1                     | 2                     | 3                     | 4                     | 5                     | 6                     | 7 +                   |
|-------------------------|-----------------------|-----------------------|-----------------------|-----------------------|-----------------------|-----------------------|-----------------------|-----------------------|
| Before the restrictions | <input type="radio"/> |
| During level FOUR       | <input type="radio"/> |
| During level THREE      | <input type="radio"/> |

**On average, how many servings of milk or other dairy products did you have per day?**

**E.g. yoghurt and cheese**

**A serving is the same as 1 glass of milk (250ml) or 1 small pottle of yoghurt (125-150g) or 2 slices of cheese (40g)**

|                         | 0                     | 1                     | 2                     | 3                     | 4                     | 5                     | 6                     | 7 +                   |
|-------------------------|-----------------------|-----------------------|-----------------------|-----------------------|-----------------------|-----------------------|-----------------------|-----------------------|
| Before the restrictions | <input type="radio"/> |
| During level FOUR       | <input type="radio"/> |
| During level THREE      | <input type="radio"/> |

**On average, how many servings of plant based drinks did you have per day?**

**E.g. rice, soy, oat**

**A serving is the same as one glass (250ml)**

|                         | 0                     | 1                     | 2                     | 3                     | 4                     | 5                     | 6                     | 7 +                   |
|-------------------------|-----------------------|-----------------------|-----------------------|-----------------------|-----------------------|-----------------------|-----------------------|-----------------------|
| Before the restrictions | <input type="radio"/> |
| During level FOUR       | <input type="radio"/> |
| During level THREE      | <input type="radio"/> |

**The following questions are about which type of flour you ate more of, wholemeal vs. white flour**

On average, what type of bread/toast, chapatti/roti or bread roll did you eat MOST often Before the restrictions?

- White bread or flour
- High fibre white bread or flour
- Wholemeal bread or flour
- Light grain bread or flour (e.g. Molenberg, Freya's, Ploughmans, Mackenzie High Country)
- Heavy grain bread (e.g. Vogels and Burgen)
- Other
- Don't know









**On average, how often did you eat vegetarian dishes for the main meal per week?**

|                         | 0                     | 1                     | 2                     | 3                     | 4                     | 5                     | 6                     | 7                     |
|-------------------------|-----------------------|-----------------------|-----------------------|-----------------------|-----------------------|-----------------------|-----------------------|-----------------------|
| Before the restrictions | <input type="radio"/> |
| During level FOUR       | <input type="radio"/> |
| During level THREE      | <input type="radio"/> |

**The following questions are about where you ate**

On average, how often did you eat fast food or takeaways from places like McDonalds, KFC, etc

Before the restrictions?

Think about breakfast, lunch, dinner and snacks. Do NOT include times when you have only purchased a drink/beverage

- Never / Less than once per month
- 1 time per month
- 2 times per month
- 1 time per week
- 2 -3 times per week
- 4-5 times per week
- 6 -7 times per week

On average, how often did you eat fast food or takeaways from places like McDonalds, KFC, etc

During level THREE?

Think about breakfast, lunch, dinner and snacks. Do NOT include times when you have only purchased a drink/beverage

- Never / Less than once per month
- 1 time per month
- 2 times per month
- 1 time per week
- 2 -3 times per week
- 4-5 times per week
- 6 -7 times per week

On average, how often did you eat food from restaurants or cafes

Before the restrictions?

NOT including fast food or takeaways mentioned above

Think about breakfast, lunch, dinner and snacks. Do not include times when you have only purchased a drink/beverage

- Never / Less than once per month
- 1 time per month
- 2 times per month
- 1 time per week
- 2 -3 times per week
- 4-5 times per week
- 6 -7 times per week

On average, how often did you eat food from restaurants or cafes

During level THREE?

NOT including fast food or takeaways mentioned above

Think about breakfast, lunch, dinner and snacks. Do not include times when you have only purchased a drink/beverage

- Never / Less than once per month
- 1 time per month
- 2 times per month
- 1 time per week
- 2 -3 times per week
- 4-5 times per week
- 6 -7 times per week

**On average, how often per week did you eat the main meal, prepared at your home?**

|                         | 0                     | 1                     | 2                     | 3                     | 4                     | 5                     | 6                     | 7                     |
|-------------------------|-----------------------|-----------------------|-----------------------|-----------------------|-----------------------|-----------------------|-----------------------|-----------------------|
| Before the restrictions | <input type="radio"/> |
| During level FOUR       | <input type="radio"/> |
| During level THREE      | <input type="radio"/> |

**The following questions are about who you ate with**

Compared to before the restrictions, how did level FOUR change how often you ate shared meals outside of your home, with extended family/whānau or friends?

- Less often
- No change
- More often

Compared to before the restrictions, how did level THREE change how often you ate shared meals outside of your home, with extended family/whānau or friends?

- Less often
- No change
- More often

Compared to before the restrictions, how did level FOUR change how often you ate shared meals outside your home at church gatherings, sports or club gatherings, at the marae, or with work colleagues?

- Less often
- No change
- More often

Compared to before the restrictions, how did level THREE change how often you ate shared meals outside your home at church gatherings, sports or club gatherings, at the marae, or with work colleagues?

- Less often
- No change
- More often

**The following questions are about food Shopping**

---

**Online**

---

On average, how often did your household, shop for food online

Before the restrictions?

E.g. Click and collect or delivery

- Never / Less than once per month
- 1 time per month
- 2 times per month
- 1 time per week
- 2 -3 times per week
- 4-5 times per week
- 6 -7 times per week

---

On average, how often did your household, shop for food online

During level FOUR?

E.g. Click and collect or delivery

- Never / Less than once per month
- 1 time per month
- 2 times per month
- 1 time per week
- 2 -3 times per week
- 4-5 times per week
- 6 -7 times per week

---

On average, how often did your household, shop for food online

During level THREE?

E.g. Click and collect or delivery

- Never / Less than once per month
- 1 time per month
- 2 times per month
- 1 time per week
- 2 -3 times per week
- 4-5 times per week
- 6 -7 times per week

---

**Supermarket**

---

On average, how often did your household, shop for food at a supermarket, in person

Before the restrictions?

E.g. physically at the supermarket, NOT online

- Never / Less than once per month
- 1 time per month
- 2 times per month
- 1 time per week
- 2 -3 times per week
- 4-5 times per week
- 6 -7 times per week

---

On average, how often did your household, shop for food at a supermarket, in person

During level FOUR?

E.g. physically at the supermarket, NOT online

- Never / Less than once per month
- 1 time per month
- 2 times per month
- 1 time per week
- 2 -3 times per week
- 4-5 times per week
- 6 -7 times per week

---

On average, how often did your household, shop for food at a supermarket, in person

During level THREE?

E.g. physically at the supermarket, NOT online

- Never / Less than once per month
- 1 time per month
- 2 times per month
- 1 time per week
- 2 -3 times per week
- 4-5 times per week
- 6 -7 times per week

## Dairy

On average, how often did your household shop for food at a dairy

Before the restrictions?

- Never / Less than once per month
- 1 time per month
- 2 times per month
- 1 time per week
- 2 -3 times per week
- 4-5 times per week
- 6 -7 times per week

On average, how often did your household shop for food at a dairy

During level FOUR?

- Never / Less than once per month
- 1 time per month
- 2 times per month
- 1 time per week
- 2 -3 times per week
- 4-5 times per week
- 6 -7 times per week

On average, how often did your household shop for food at a dairy

During level THREE?

- Never / Less than once per month
- 1 time per month
- 2 times per month
- 1 time per week
- 2 -3 times per week
- 4-5 times per week
- 6 -7 times per week

## Fruit and Vege market

On average, how often did your household shop at a fruit and vege market, in person

Before the restrictions?

E.g. physically at the supermarket, NOT online

- Never / Less than once per month
- 1 time per month
- 2 times per month
- 1 time per week
- 2 -3 times per week
- 4-5 times per week
- 6 -7 times per week

On average, how often did your household shop at a fruit and vege market, in person

During level THREE?

E.g. physically at the supermarket, NOT online

- Never / Less than once per month
- 1 time per month
- 2 times per month
- 1 time per week
- 2 -3 times per week
- 4-5 times per week
- 6 -7 times per week

## Other food shops

On average, how often did your household shop for food at other types of shops,

Before the restrictions?

E.g. The butchers, the greengrocers, or specialty food stores

- Never / Less than once per month
- 1 time per month
- 2 times per month
- 1 time per week
- 2 -3 times per week
- 4-5 times per week
- 6 -7 times per week

---

On average, how often did your household shop for food at other types of shops,

During Level FOUR?

E.g. The butchers, the greengrocers, or specialty food stores

- Never / Less than once per month
- 1 time per month
- 2 times per month
- 1 time per week
- 2 -3 times per week
- 4-5 times per week
- 6 -7 times per week

---

On average, how often did your household shop for food at other types of shops,

During level THREE?

E.g. The butchers, the greengrocers, or specialty food stores

- Never / Less than once per month
- 1 time per month
- 2 times per month
- 1 time per week
- 2 -3 times per week
- 4-5 times per week
- 6 -7 times per week

---

**The following questions are about the impact COVID-19 had on you / your household**

---

What impact did level FOUR have on how your household shopped for food?

- No impact
- small impact
- Moderate impact
- significant impact

---

Please give an example of how level FOUR impacted on how your household shopped for food

\_\_\_\_\_

---

What impact did level THREE have on how your household shopped for food?

- No impact
- small impact
- Moderate impact
- significant impact

---

Please give an example of how level THREE impacted on how your household shopped for food

\_\_\_\_\_

---

**Food purchases**

---

What impact did level FOUR have on the types of food your household purchased?

- No impact
- Small impact
- Moderate impact
- Significant impact

---

Please give an example of how level FOUR impacted on the type of food your household purchased

\_\_\_\_\_

---

What impact did level THREE have on the types of food your household purchased?

- No impact
- Small impact
- Moderate impact
- Significant impact

---

Please give an example of how level THREE impacted on the type of food your household purchased

**On average, how often per WEEK, did you eat meals that are commercially supplied or prepared, then eaten in your home?**

**Such as completely cooked meal packages e.g. Woop, Getfed, Dinnerin etc or partially prepared food e.g. Hello Fresh, My Food Bag etc**

|                         | 0                     | 1                     | 2                     | 3                     | 4                     | 5                     | 6                     | 7+                    |
|-------------------------|-----------------------|-----------------------|-----------------------|-----------------------|-----------------------|-----------------------|-----------------------|-----------------------|
| Before the restrictions | <input type="radio"/> |
| During level FOUR       | <input type="radio"/> |
| During level THREE      | <input type="radio"/> |

### Type of food

What impact did level FOUR have on the types of food your household prepared?

No impact  
 Small impact  
 Moderate impact  
 Significant impact

Please give an example of how level FOUR impacted on the type of food your household prepared

\_\_\_\_\_

What impact did level THREE have on the types of food your household prepared?

No impact  
 Small impact  
 Moderate impact  
 Significant impact

Please give an example of how level THREE impacted on the type of food your household prepared

\_\_\_\_\_

### Frozen food

Compared to your eating habits before the restrictions, how did level FOUR change how often you ate meals or ingredients that were pre-frozen?

Less often  
 No change  
 More often

Please give an example of how level FOUR changed how often you ate ingredients that were purchased frozen?

\_\_\_\_\_

Compared to your eating habits before the restrictions, how did level THREE change how often you ate meals or ingredients that were pre-frozen?

Less often  
 No change  
 More often

Please give an example of how level THREE changed how often you ate ingredients that were purchased frozen?

\_\_\_\_\_

---

**Meals made at home**

---

Compared to your eating habits before the restrictions, how did level FOUR change how often you ate meals prepared by someone in your home?

- Less often
- No change
- More often

Do NOT include food made from meal boxes such as 'My Food Bag', or other ready-made meals.

---

Please give an example of how level FOUR changed how often you ate meals prepared by someone in your house

---

Compared to your eating habits before the restrictions, how did level THREE change how often you ate meals prepared by someone in your home?

- Less often
- No change
- More often

Do NOT include food made from meal boxes such as 'My Food Bag', or other ready-made meals.

---

Please give an example of how level THREE changed how often you ate meals prepared by someone in your house

---

---

**Portion sizes**

---

Compared to your eating habits before the restrictions, how did level FOUR change the amount you eat?

- Smaller portions
- No change
- Bigger portions

Please give an example of how the level FOUR changed the amount you eat

---

Compared to your eating habits before the restrictions, how did level THREE change the amount you eat?

- Smaller portions
- No change
- Bigger portions

Please give an example of how the level THREE changed the amount you eat

---

---

**How often you eat**

---

Compared to your eating habits before the restrictions, how did level FOUR change how often you eat?

- Less often
- No change
- More often

Please give an example of how the level FOUR impacted on how often you eat

---

---

Compared to your eating habits before the restrictions, how did level THREE change how often you eat?

- Less often
- No change
- More often

---

Please give an example of how the level THREE impacted on how often you eat

\_\_\_\_\_

---

Compared to your eating habits before the restrictions, how did level FOUR change how often you SNACK?

- Less often
- No change
- More often

---

Please give an example of how the level FOUR impacted on how often you SNACK

\_\_\_\_\_

---

Compared to your eating habits before the restrictions, how did level THREE change how often you SNACK?

- Less often
- No change
- More often

---

Please give an example of how the level THREE impacted on how often you SNACK

\_\_\_\_\_

---

### Blood sugar levels

---

Compared to your before the restrictions, how did level FOUR impact your ability to stay within the recommended blood sugar level range?

- It was easier to stay within the recommended range
- No impact
- It was harder to stay within the recommended range

---

Please give an example of how the level FOUR impacted on your ability to stay within the recommended blood sugar level range

\_\_\_\_\_

---

Compared to your before the restrictions, how did level THREE impact your ability to stay within the recommended blood sugar level range?

- It was easier to stay within the recommended range
- No impact
- It was harder to stay within the recommended range

---

Please give an example of how the level THREE impacted on your ability to stay within the recommended blood sugar level range

\_\_\_\_\_

---

### How healthy you eat

---

Compared to your eating habits before the restrictions, how did level FOUR change how healthy overall, you think your diet is?

- Less healthy
- No change
- More healthy

---

Please give an example of how the level FOUR changed how healthy overall, you think your diet is

\_\_\_\_\_

---

Compared to your eating habits before the restrictions, how did level THREE change how healthy overall, you think your diet is?

- Less healthy
- No change
- More healthy

---

Please give an example of how the level THREE changed how healthy overall, you think your diet is

---

---

### Physical Activity

Compared to your physical activity before the restrictions, how has level FOUR changed how much physical activity you do?

- Less physical activity  
 No change  
 More physical activity

---

Please give an example of how level FOUR changed the physical activity you do

---

---

Compared to your physical activity before the restrictions, how has level THREE changed how much physical activity you do?

- Less physical activity  
 No change  
 More physical activity

---

Please give an example of how level THREE changed the physical activity you do

---

---

### The following questions are about you and your baby

---

What year were you born?

---

(E.g. 1985)

---

Which ethnic group or groups do you belong to?

- New Zealand European/ European  
 Māori  
 Samoan  
 Cook Island Māori  
 Tongan  
 Niuean  
 Tokelauan  
 Other Pacific  
 Fijian  
 Indian  
 Other European  
 Asian not defined  
 Chinese  
 South East Asian  
 Middle Eastern  
 Latin American /Hispanic  
 Africa  
 Other  
 Don't know

---

Other ethnicity, please specify

---

---

What type of diabetes do you have?

TYPE 1 diabetes is usually diagnosed in childhood, but can be diagnosed as an adult. When people are diagnosed with type 1 diabetes they always need insulin.

TYPE 2 diabetes is usually diagnosed as an adult. It is often seen in families. It can be managed by increasing exercise, a change in diet, or by taking medication -tablets or insulin.

- Gestational (pregnancy-related) diabetes
- Type 1 diabetes
- Type 2 diabetes.
- Don't know

---

When were you told you had gestational diabetes?

Your best guess is fine \_\_\_\_\_

---

### Your pregnancy

---

What is your Estimated Date of Delivery?

\_\_\_\_\_  
(DD-MM-YYYY)

---

How many babies have you given birth to?

If this is your first pregnancy, select 'none'

- None
- 1
- 2
- 3
- 4
- 5
- 6
- 7
- 8
- 9
- 10 or more

---

### Who you live with

**These questions help us to better understand your bubble before and during the COVID-19 restrictions**

---

How many adults (aged 16 and over) lived in your house at least part of the time before the restrictions?

- I live alone
- 1 other adult
- 2 other adults
- 3 other adults
- 4 other adults
- 5 other adults
- other - please specify

---

How many adults (aged 16 and over) lived in your house at least part of the time before the restrictions? \_\_\_\_\_

---

How many children (aged 15 and younger) lived in your house at least part of the time before the restrictions?

- no children
- 1 child
- 2 children
- 3 children
- 4 children
- 5 children
- other - please specify

---

How many children (aged 15 and younger) lived in your house at least part of the time before the restrictions? \_\_\_\_\_

---

**Level FOUR**

Was there any change to the number of people that lived in your household during Alert level FOUR ?

- Yes
- No

---

How many adults (aged 16 and over) lived in your house at least part of the time for level FOUR?

- I live alone
- 1 other adult
- 2 other adults
- 3 other adults
- 4 other adults
- 5 other adults
- other - please specify

---

How many adults (aged 16 and over) lived in your house at least part of the time for level FOUR? \_\_\_\_\_

---

How many children (aged 15 and younger) lived in your house at least part of the time for level FOUR?

- no children
- 1 child
- 2 children
- 3 children
- 4 children
- 5 children
- other - please specify

---

How many children (aged 15 and younger) lived in your house at least part of the time for level FOUR? \_\_\_\_\_

---

**Level THREE**

Was there any change to the number of people that lived in your household during Alert level THREE ?

- Yes
- No

---

How many adults (aged 16 and over) lived in your house at least part of the time for level THREE?

- I live alone
- 1 other adult
- 2 other adults
- 3 other adults
- 4 other adults
- 5 other adults
- other - please specify

---

How many adults (aged 16 and over) lived in your house at least part of the time for level THREE? \_\_\_\_\_

How many children (aged 15 and younger) lived in your house at least part of the time for level THREE?

- no children
- 1 child
- 2 children
- 3 children
- 4 children
- 5 children
- other - please specify

How many children (aged 15 and younger) lived in your house at least part of the time for level THREE? \_\_\_\_\_

### Your income

Has there been a change in your household's overall income level due to the COVID-19 restrictions?

- Less income
- No change
- More income

Has this change in income affected your eating habits?

- Yes
- No

How has this change in income affected your eating habits? \_\_\_\_\_

Please give an example of how this change in income affected your eating habits \_\_\_\_\_

### Your work Did you work outside of the home?

|                                                     | Yes                   | No                    |
|-----------------------------------------------------|-----------------------|-----------------------|
| Before the restrictions                             | <input type="radio"/> | <input type="radio"/> |
| During level FOUR (as an active 'essential worker') | <input type="radio"/> | <input type="radio"/> |
| During level THREE                                  | <input type="radio"/> | <input type="radio"/> |

### Diabetes in Pregnancy clinics

#### We would like to know about your experience with our clinic during the COVID-19 alert level THREE and alert level FOUR response

In general, I found the experience of the face to face clinic . . .

- Very good
- Good
- Neither bad nor good
- Bad
- Very bad
- I have not had this type of clinic visit

In general, I found the experience of the remote clinic phone call(s)

- Very good
- Good
- Neither bad nor good
- Bad
- Very bad
- I have not had this type of clinic visit

---

Please explain your answer

---

Which clinic do you mostly attend?

- Wellington  
 Kenepuru  
 Prefer not to answer

## Results

Table 2: Characteristics of respondents

| Variable                                                                    | Mean (SD) [range] |
|-----------------------------------------------------------------------------|-------------------|
| No. of adults ( $\geq 16$ years) in the household before the restrictions   | n/48 (%)          |
| Live alone                                                                  | 1 (2.1)           |
| 1 other adult                                                               | 33 (68.8)         |
| 2 other adults                                                              | 4 (8.3)           |
| 3 other adults                                                              | 7 (14.6)          |
| 4+ other adults                                                             | 3 (6.3)           |
| No. of children ( $\leq 15$ years) in the household before the restrictions |                   |
| No children                                                                 | 21 (43.8)         |
| 1 child                                                                     | 18 (37.5)         |
| 2 children                                                                  | 7 (14.6)          |
| 3+ children                                                                 | 2 (4.2)           |
| Changes to no. of people in the household during the restrictions           |                   |
| Alert Level 4 = No change                                                   | 45 (93.8)         |
| Alert Level 3 = No change                                                   | 47 (97.9)         |
| Working outside of home <sup>a</sup>                                        |                   |
| Before restrictions = No                                                    | 18 (37.5)         |
| Alert Level 4 = No                                                          | 44 (91.7)         |
| Alert Level 3 = No                                                          | 44 (91.7)         |

a) Planned maternity leave dates were not factored into this question.

Table 3: The Frequency of Food Items Consumed Before and During Alert Level 4 and Alert Level 3 COVID-19 Restrictions Among Pregnant Women with Diabetes

| Food item             | No. of servings per week <i>n</i> (%) |           |          | OR (CI 95%) <sup>1</sup>   |
|-----------------------|---------------------------------------|-----------|----------|----------------------------|
|                       | 0-1x week                             | 2-3x week | ≥4x week |                            |
| <b>Chicken</b>        |                                       |           |          |                            |
| Before                | 9 (18)                                | 27 (54)   | 14 (28)  |                            |
| level 4               | 9 (18)                                | 26 (52)   | 15 (30)  | 0.74 (0.34 to 1.60) p=0.44 |
| level 3               | 10 (20)                               | 25 (50)   | 15 (30)  |                            |
| <b>Fish canned</b>    |                                       |           |          |                            |
| Before                | 39 (78)                               | 10 (20)   | 1 (2)    |                            |
| level 4               | 37 (74)                               | 9 (18)    | 4 (8)    | 0.83 (0.36 to 1.91) p=0.66 |
| level 3               | 37 (74)                               | 11 (22)   | 2 (4)    |                            |
| <b>Legumes/pulses</b> |                                       |           |          |                            |
| Before                | 29 (58)                               | 15 (30)   | 6 (12)   |                            |
| level 4               | 29 (58)                               | 12 (24)   | 9 (18)   | 0.82 (0.35 to 1.92) p=0.63 |
| level 3               | 33 (66)                               | 9 (18)    | 8 (16)   |                            |

*n*=50. 1) Odds ratio (OR) of lower ordered values (lower frequency of servings) during Alert level 4 compared to before the restrictions.

Table 4: Frequency of consumption of bread before and during COVID-19 Alert Level 3 and 4.

|         | Type of bread consumed |                          |                      |              |
|---------|------------------------|--------------------------|----------------------|--------------|
|         | White bread or flour   | Wholemeal bread or flour | Light or heavy grain | Other breads |
| Before  | 16 (32)                | 21 (42)                  | 12 (24)              | 1 (2)        |
| Level 4 | 15 (30)                | 21 (42)                  | 13 (26)              | 1 (2)        |
| Level 3 | 11 (22)                | 24 (48)                  | 14 (28)              | 1 (2)        |

Table 5: Adequate intake of fruit, vegetables, and dairy, according to the New Zealand Food and Nutrition Guidelines for Pregnancy and Breastfeeding during Alert Level 4 restrictions compared to before the restrictions.

|                               |                     | During Alert Level 4 |         |          | (95% CI)                       |
|-------------------------------|---------------------|----------------------|---------|----------|--------------------------------|
|                               |                     | No                   | Yes     | Total    |                                |
| Adequate intake of fruit      | Before restrictions | No                   | 4 (8)   | 5 (10)   | 9 (18)                         |
|                               |                     | Yes                  | 3 (6)   | 38 (76)  | 41 (82)                        |
|                               | Total               | 7 (14)               | 43 (86) | 50 (100) | -0.04 ( -0.15 to, 0.07) p=0.48 |
|                               |                     | During Alert Level 4 |         |          |                                |
|                               |                     | No                   | Yes     | Total    |                                |
| Adequate intake of vegetables | Before restrictions | No                   | 28 (56) | 1 (2)    | 29 (58)                        |
|                               |                     | Yes                  | 3 (6)   | 18 (36)  | 21 (42)                        |
|                               | Total               | 31 (62)              | 19 (38) | 50 (100) | -0.04 ( -0.12 to, 0.04) p=0.31 |
|                               |                     | During Alert Level 4 |         |          |                                |
|                               |                     | No                   | Yes     | Total    |                                |
| Adequate intake of Dairy      | Before restrictions | No                   | 23 (46) | 7 (14)   | 30 (60)                        |
|                               |                     | Yes                  | 3 (6)   | 17 (34)  | 20 (40)                        |
|                               | Total               | 26 (52)              | 24 (48) | 50 (100) | -0.08 (-0.20 to, 0.04) p=0.20  |

n (%), Yes = adequate intake according to the NZ Food and Nutrition Guidelines for Pregnancy and Breastfeeding, No = inadequate intake according to the NZ Food and Nutrition Guidelines for Pregnancy and Breastfeeding.

Table 6: The Frequency of Types of Meals Consumed Before and During Alert Level 4 and Alert Level 3 COVID-19 Restrictions Among Pregnant Women with Diabetes

| Types of meals          | Frequency of meals <i>n</i> (%) |           |           |           | OR (CI 95%) <sup>1</sup>   |
|-------------------------|---------------------------------|-----------|-----------|-----------|----------------------------|
|                         | 0-1x week                       | 2-3x week | 4-5x week | 6-7x week |                            |
| Breakfast               |                                 |           |           |           |                            |
| Before                  | 7 (14)                          | 7 (14)    | 4 (8)     | 32 (64)   |                            |
| level 4                 | 5 (10)                          | 7 (14)    | 2 (4)     | 36 (72)   | 0.59 (0.23 to 1.55) p=0.28 |
| level 3                 | 6 (12)                          | 7 (14)    | 1 (2)     | 36 (72)   |                            |
| Vegetarian <sup>a</sup> |                                 |           |           |           |                            |
| Before                  | 31 (62)                         | 11 (22)   | 2 (4)     | 6 (12)    |                            |
| level 4                 | 31 (62)                         | 10 (20)   | 3 (6)     | 6 (12)    | 0.70 (0.27 to 1.80) p=0.45 |
| level 3                 | 31 (62)                         | 10 (20)   | 3 (6)     | 6 (12)    |                            |
| Vegan <sup>b</sup>      |                                 |           |           |           |                            |
| Before                  | 39 (78)                         | 6 (12)    | 2 (4)     | 3 (6)     |                            |
| level 4                 | 37 (74)                         | 8 (16)    | 3 (6)     | 2 (4)     | 0.79 (0.27 to 2.29) p=0.66 |
| level 3                 | 39 (78)                         | 6 (12)    | 2 (4)     | 3 (6)     |                            |

N= 50 a) Vegetarian for main meal only, b) Vegan for main meal only, c) n=49, Main meal commercially supplied or prepared (e.g., Hello Fresh, Woop, My Food bag) and then consumed at home.

Table 7: The Frequency of Different Shopping Methods Before and During Alert Level 4 and Alert Level 3 COVID-19 Restrictions Among Women with Diabetes in Pregnancy

| Method of Shopping               | Frequency of shopping <i>n</i> (%) |             |         |           |          | OR (CI 95%) <sup>1</sup>                  |
|----------------------------------|------------------------------------|-------------|---------|-----------|----------|-------------------------------------------|
|                                  | 0-≤1x month                        | 1-2 x month | 1x week | 2-3x week | ≥4x week |                                           |
| Fruit & Vege Market <sup>a</sup> |                                    |             |         |           |          |                                           |
| Before                           | 16 (32)                            | 9 (18)      | 20 (40) | 5 (10)    | 0 (0)    |                                           |
| Level 3                          | 30 (60)                            | 8 (16)      | 10 (20) | 2 (4)     | 0 (0)    | 5.50 (2.24 to 13.47) p=0.0004             |
| Other Shops <sup>b</sup>         |                                    |             |         |           |          |                                           |
| Before                           | 18 (36)                            | 16 (32)     | 12 (24) | 4 (8)     | 0 (0)    |                                           |
| Level 3                          | 31 (62)                            | 10 (20)     | 7 (14)  | 2 (4)     | 0 (0)    | 3.97 (1.69 to 9.34) p=0.0022 <sup>1</sup> |

N=50. a) Fruit & Vegetable Market/shops all closed during Alert Level 4. b) Other Shops included butchers, green grocers or specialty food stores (they were all closed during Level 4). 1) Odds ratio (OR) lower ordered values (lower frequency of shopping) during Alert level 3 compared to before the restrictions.
